# Supplementary material for: Structural and electronic properties of double wall MoSTe nanotubes
Source: Royal Society of Chemistry journal article supplement (doi:10.1039/d3cp02369a), 2023-01-01
Supplement: d3cp02369a1.pdf [file d3cp02369a1.pdf]

*Supporting information*

**Structural and Electronic Properties of Double Wall MoSTe Nanotubes**

Zhenyun Lan,<sup>\*,a,b</sup> Theresa Isabelle Manguerra Kapunan,<sup>a</sup> Tejs Vegge,<sup>a</sup> and Ivano E. Castelli<sup>\*,a</sup>

<sup>a</sup> Department of Energy Conversion and Storage, Technical University of Denmark, Anker Engelundsvej 411, DK-2800

Kgs. Lyngby, Denmark. *E-mail:* [zhenlan@dtu.dk](mailto:zhenlan@dtu.dk); [ivca@dtu.dk](mailto:ivca@dtu.dk)

<sup>b</sup> School of Materials Science and Engineering, Hefei University of Technology, Hefei, Anhui 230009, PR China.

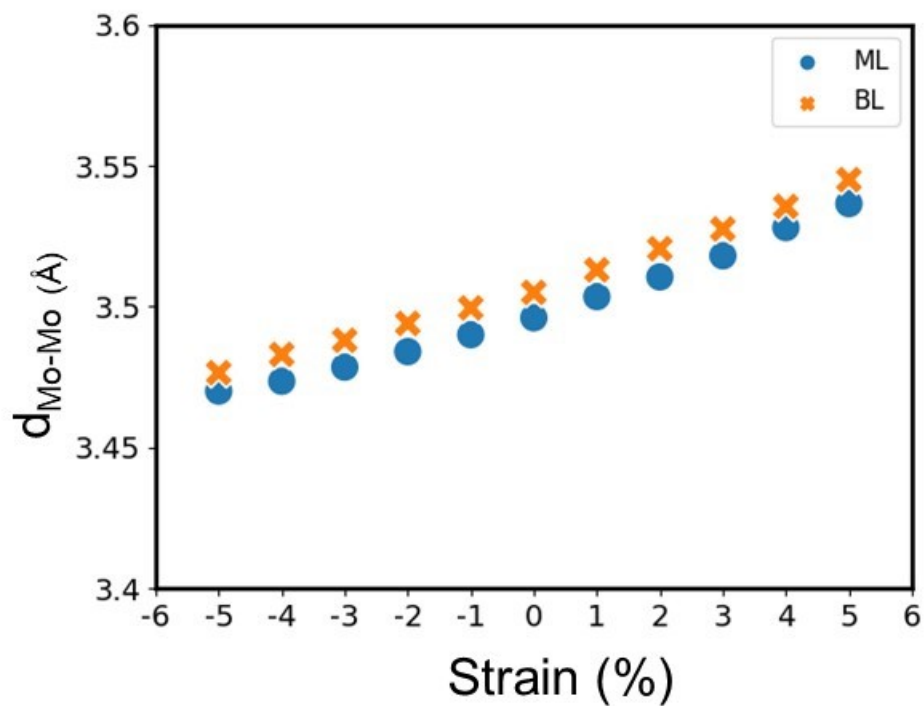

**Figure S1.** (a) The relationship between the Mo-Mo bond length for MLs, BLs, in blue, orange respectively and applied strain.

**Table S1.** The calculated band gap of 2D structures using HSE.

|                | Indirect band gap (eV) | Direct band gap (eV) |
|----------------|------------------------|----------------------|
| ML (Monolayer) | 1.08                   | 1.52                 |
| BL (Bilayer)   | Metallic               | 0.45                 |
